# Supplementary material for: Exploration of a novel geoengineering solution: lighting up tropical forests at night
Source: Copernicus journal article supplement (doi:10.5194/esd-13-219-2022), 2022-01-31

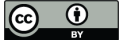

*Supplement of*

## **Exploration of a novel geoengineering solution: lighting up tropical forests at night**

**Xueyuan Gao et al.**

*Correspondence to:* Shunlin Liang (sliang@umd.edu)

The copyright of individual parts of the supplement might differ from the article licence.

**Fig. S1.** Global surface downward shortwave radiation for 24 hours since the start of the nighttime lighting experiment at 12:00 am January 1st 2015 (UTC time) under  $200\text{W}/\text{m}^2$  nighttime lighting power.

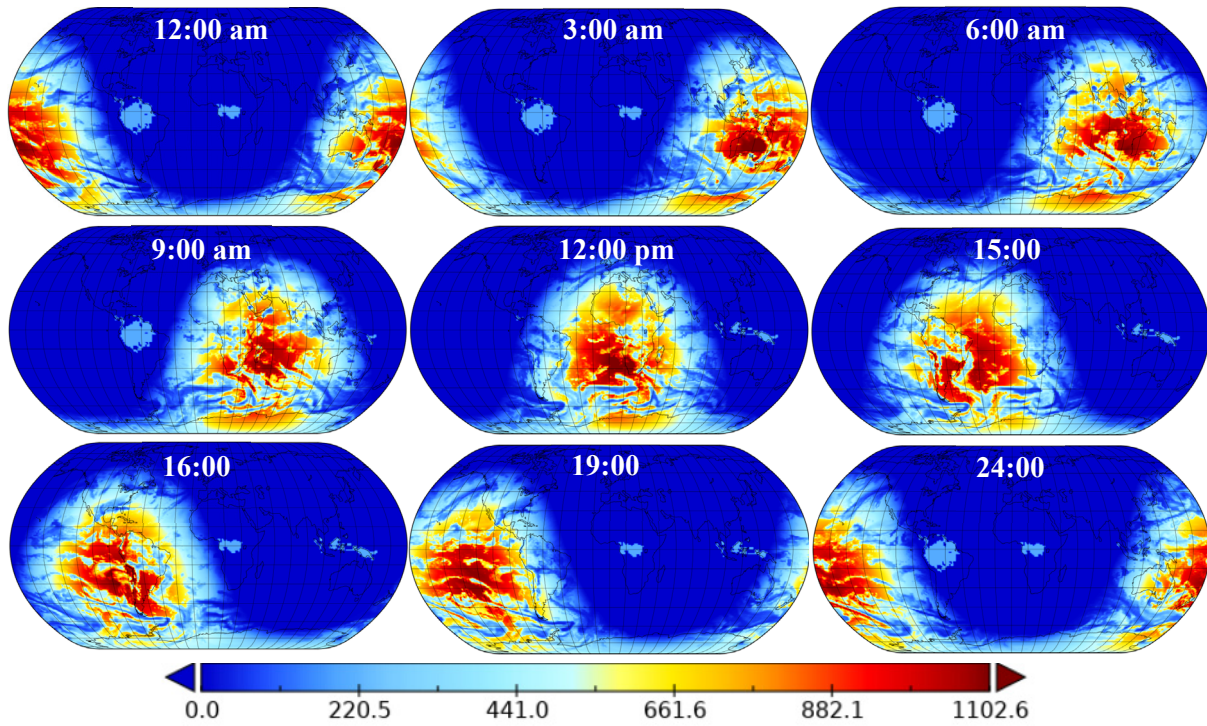

5

**Fig. S2.** 24-hour African Tropical Forest Responses

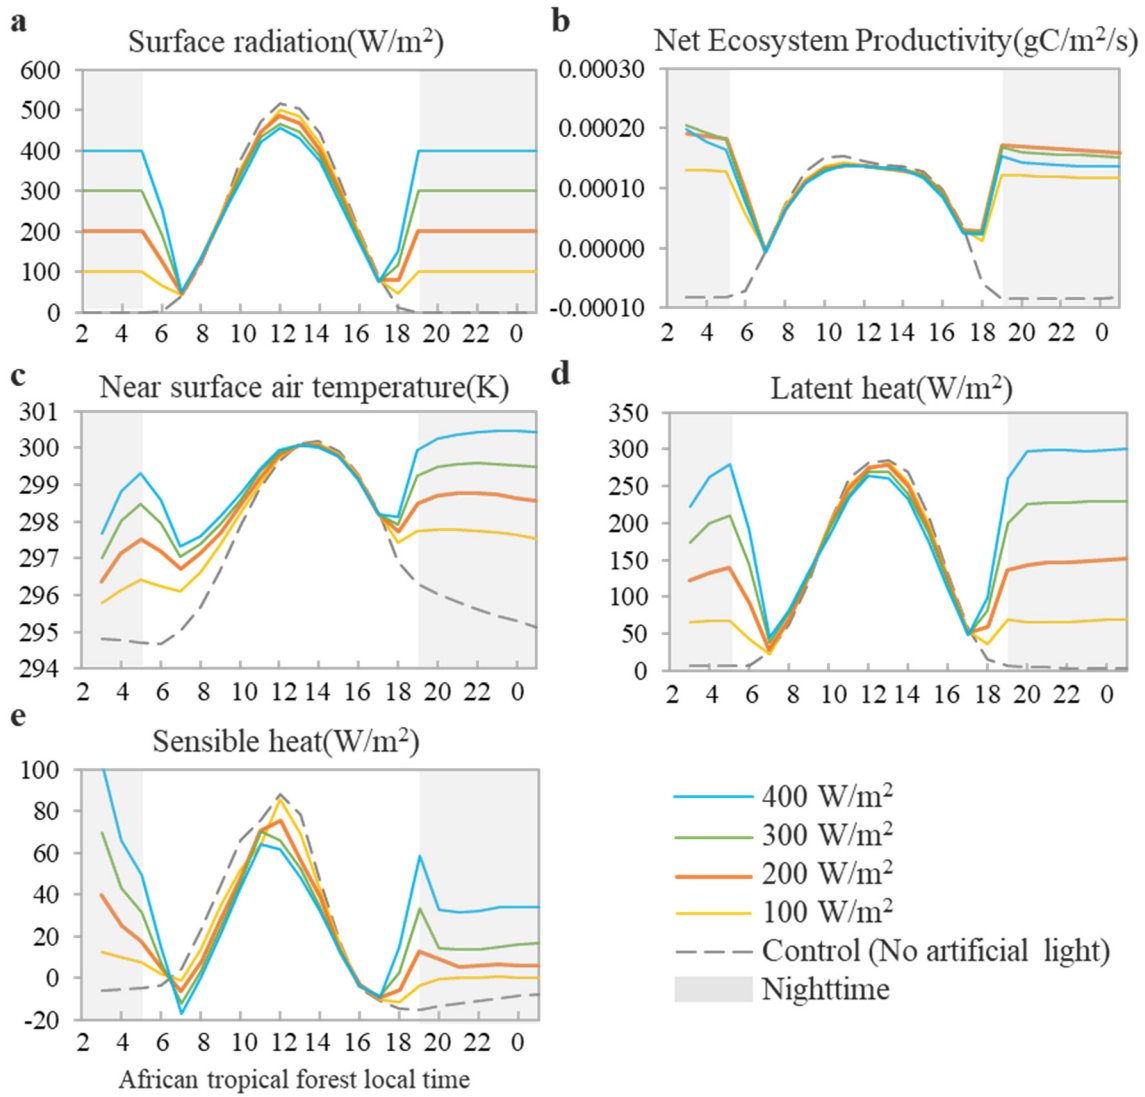

**Fig. S3.** 24-hour Asian Tropical Forest Responses

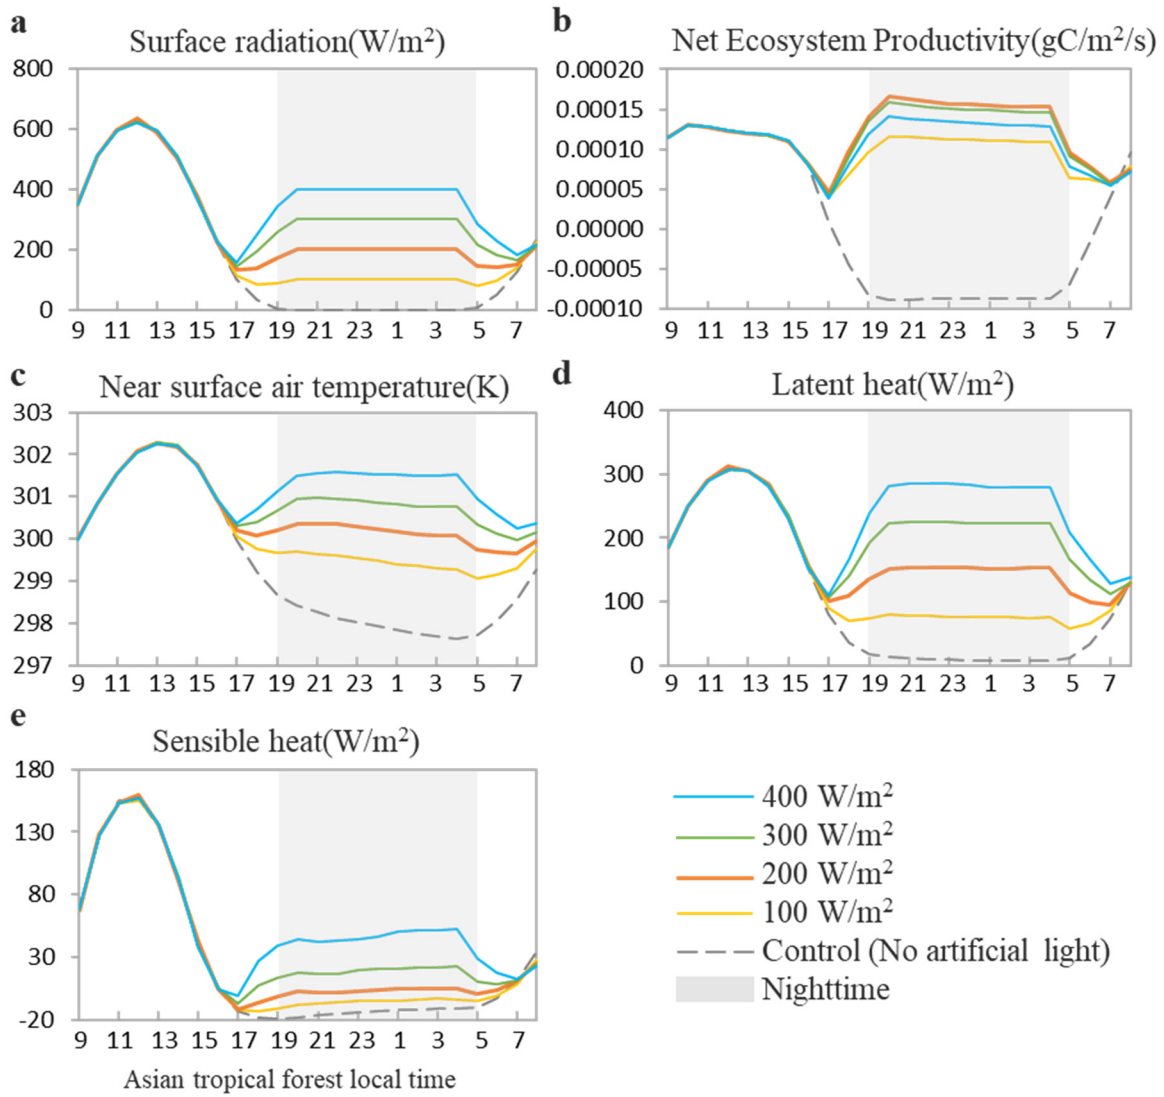

**Fig. S4.** Seasonal pattern of tropical forests air temperature and precipitation increase under the lighting experiment.

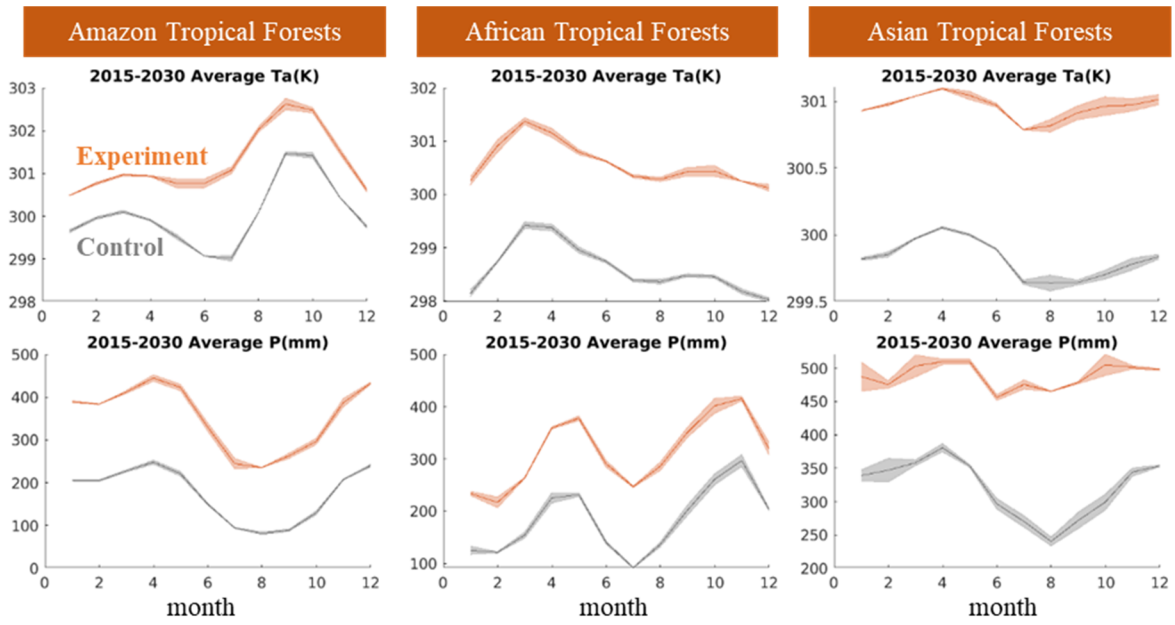

**Fig. S5. Amazonian Tropical Forest Carbon Flux, Carbon Amount, and Climate Responses.** CL in panel (j): coarse woody debris and litter.

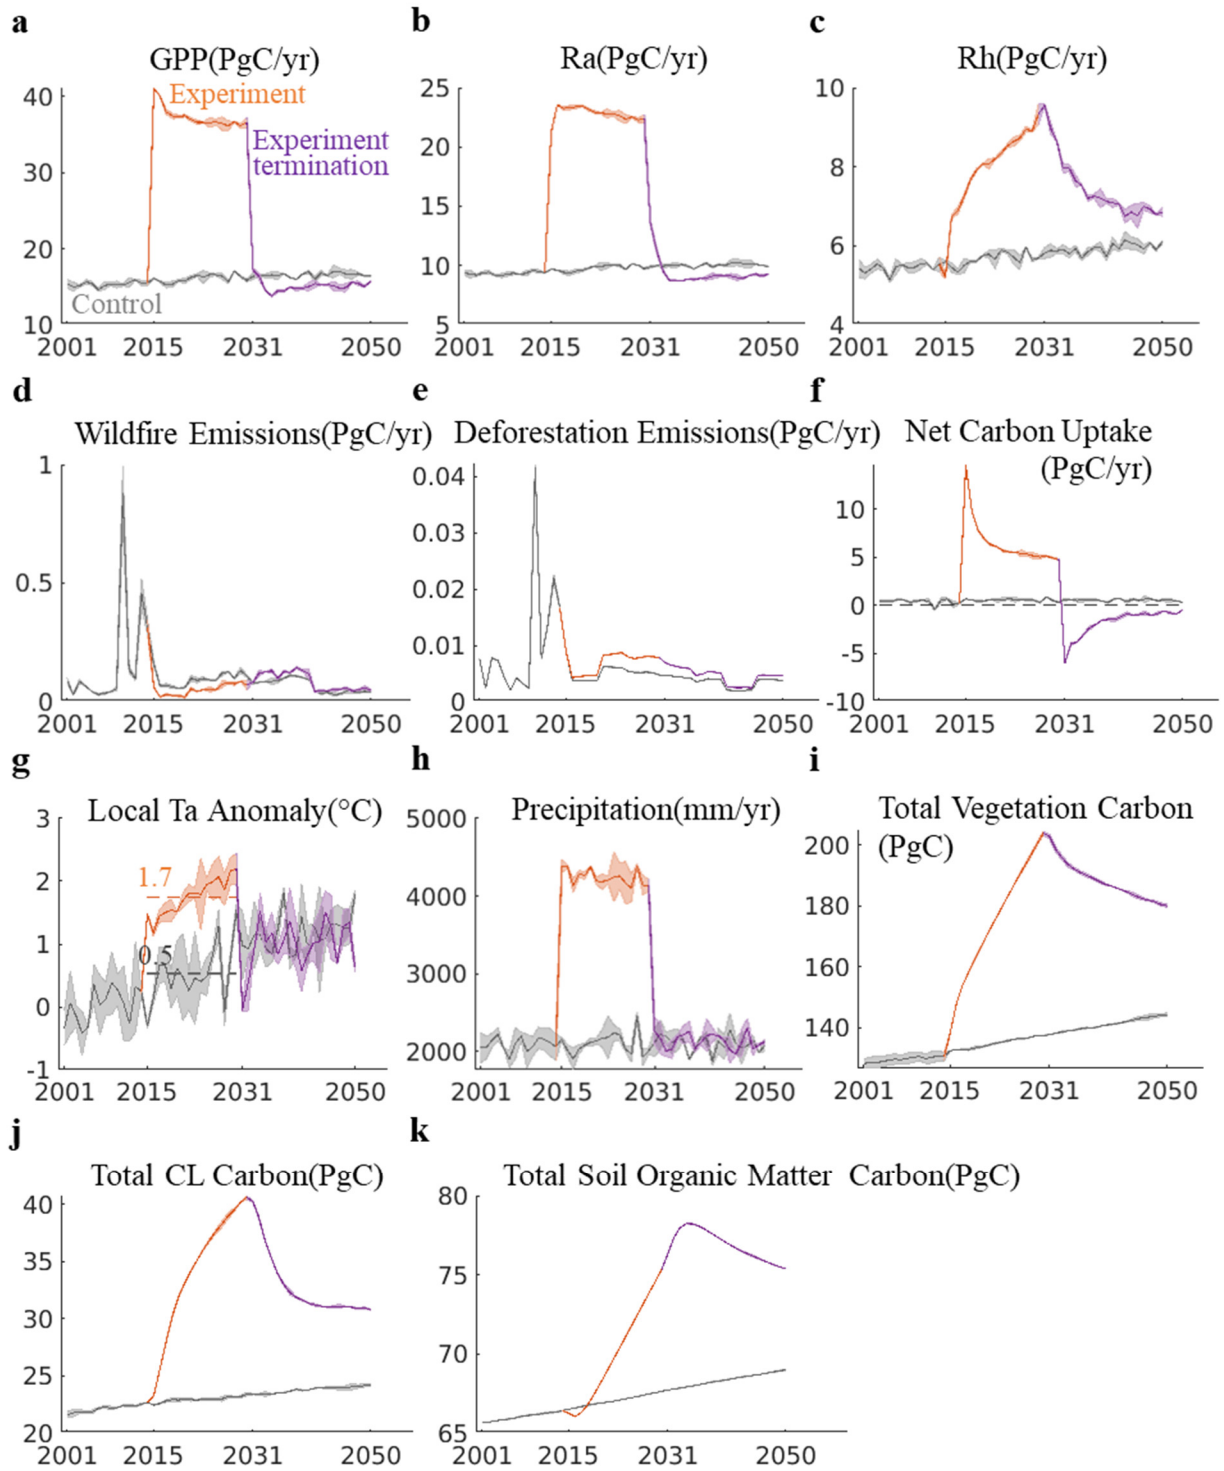

**Fig. S6. African Tropical Forest Carbon Flux, Carbon Amount, and Climate Responses. CL in panel (j): coarse woody debris and litter.**

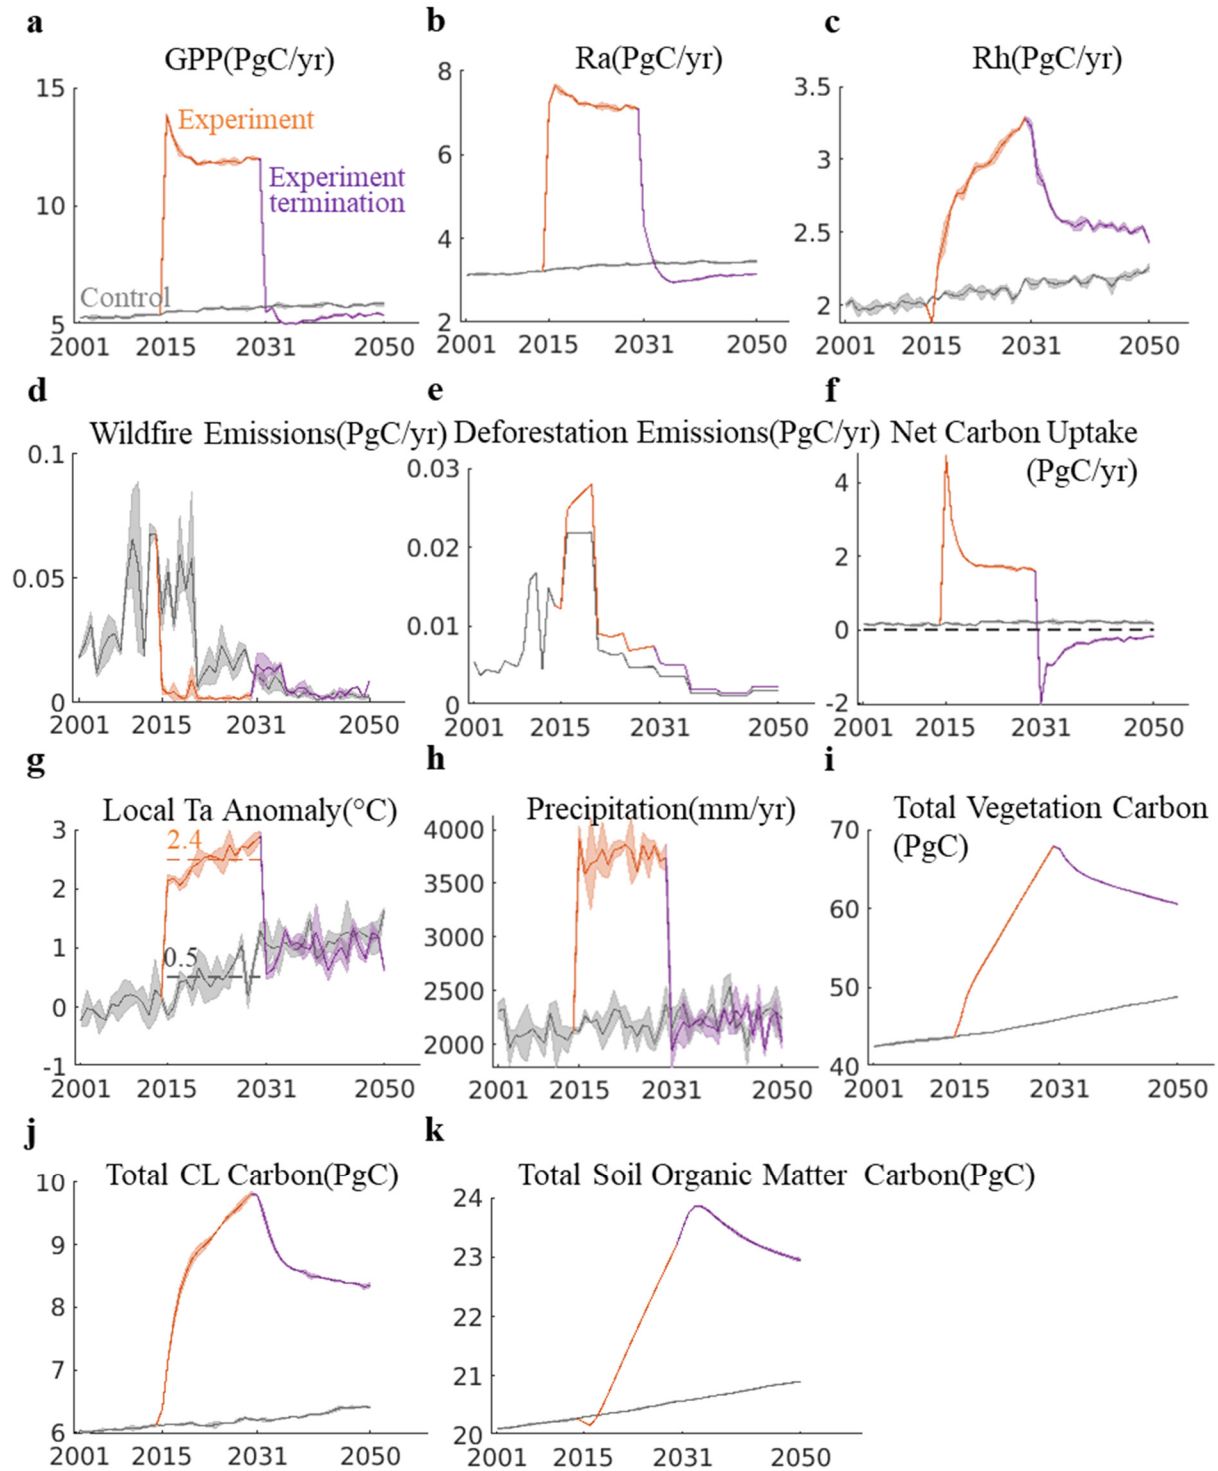

**Fig. S7. Asian Tropical Forest Carbon Flux, Carbon Amount, and Climate Responses.** CL in panel (j): coarse woody debris and litter.

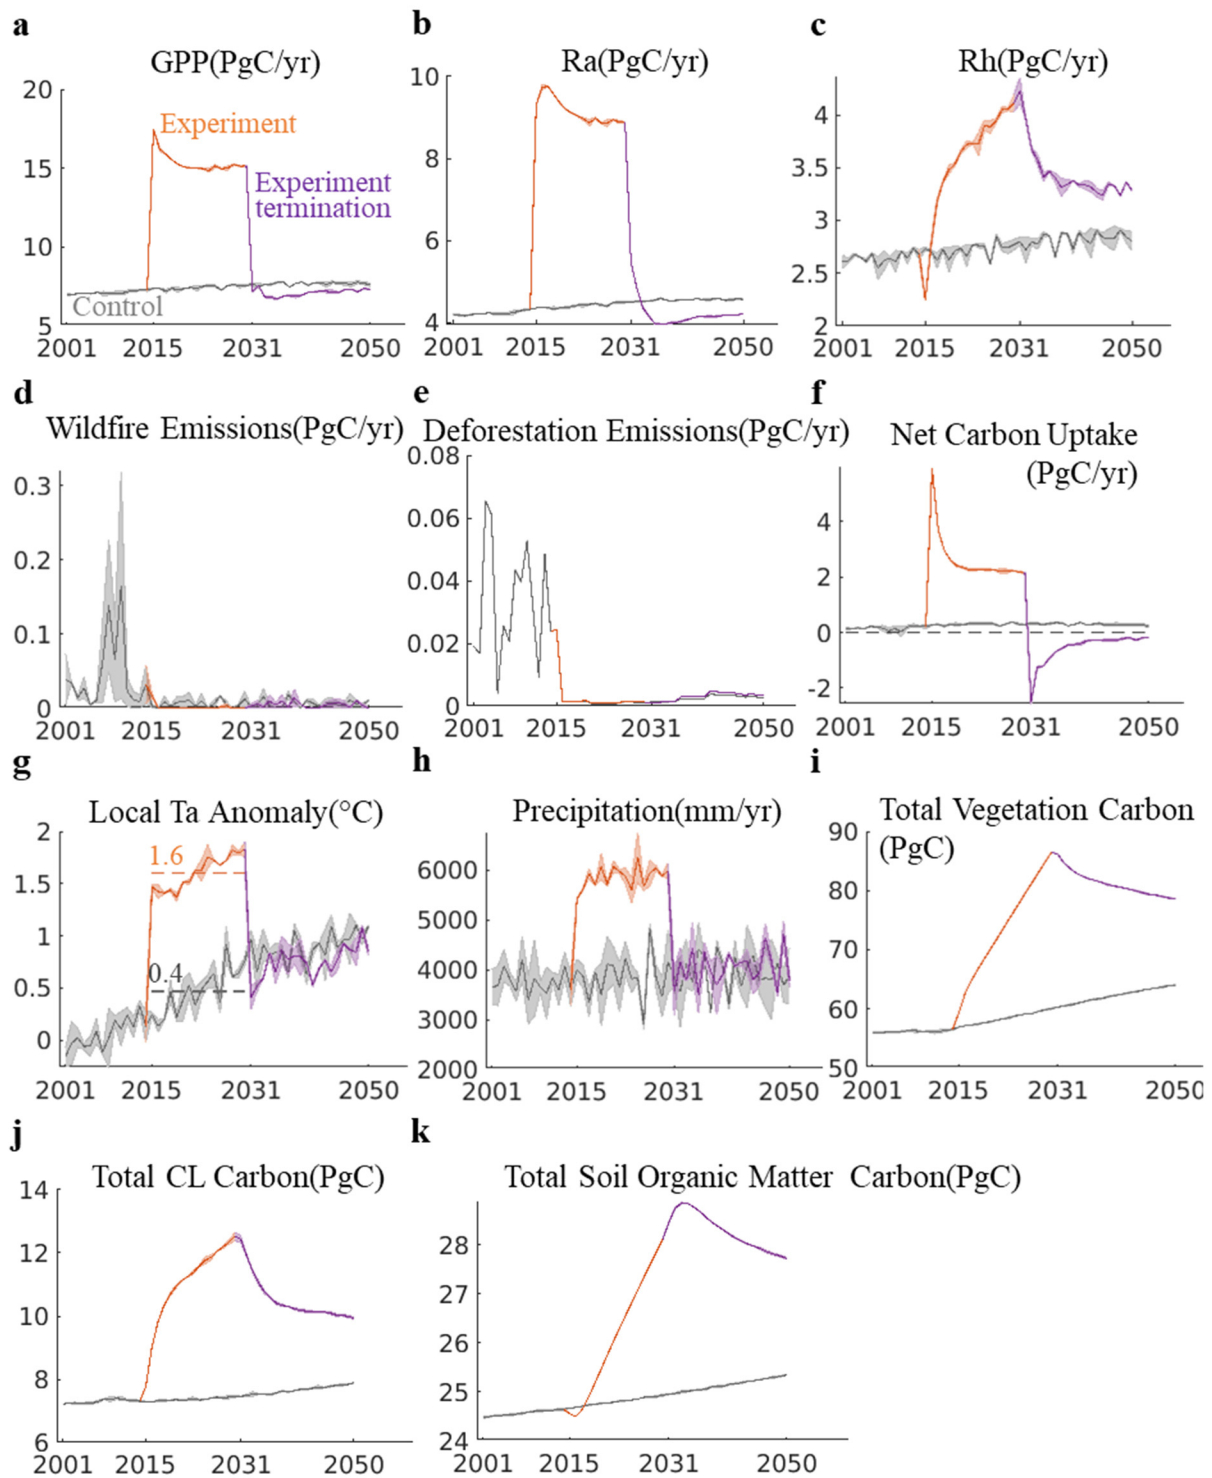

Supplement: Supplementary file 1 [file esd-13-219-2022-supplement.pdf]
